# Supplementary material for: An ultrathin gas-permeable imperceptible electronic skin enables maxillofacial electrophysiological monitoring
Source: Royal Society of Chemistry journal article supplement (doi:10.1039/d5tb02271a), 2025-12-05
Supplement: d5tb02271a1.pdf [file d5tb02271a1.pdf]

## ***Supporting Information***

### **An Ultrathin Gas-Permeable Electronic Skin Enable Imperceptible Maxillofacial Electrophysiological Monitoring**

***Yaqi Zhang<sup>a,b,c, #</sup> Minfeng Wu,<sup>d,#</sup> Yile Wang,<sup>a,b,c</sup> Xiang Chen,<sup>b,c</sup> Meiqi Wang,<sup>b,c</sup> Feng  
Chen,<sup>b,c, \*</sup> Wentao Cao,<sup>b,c, \*</sup> and Shengcai Qi<sup>a,b,c, \*</sup>***

- a. Medical College, Anhui University of Science and Technology, Huainan, P. R. China.*
- b. Department of Prosthodontics, Shanghai Stomatological Hospital & School of Stomatology, Fudan University, Shanghai 201102, P. R. China.*
- c. Shanghai Key Laboratory of Craniomaxillofacial Development and Diseases, Shanghai Stomatological Hospital & School of Stomatology, Fudan University, Shanghai 201102, P.R. China.*
- d. Department of Dermatology, Huadong Hospital Affiliated to Fudan University, Shanghai, 200040, P.R. China.*

*#These authors contributed equally to this work.*

### **Corresponding Author**

E-mail: chen\_feng@fudan.edu.cn; wt\_cao@fudan.edu.cn; qishengcai@fudan.edu.cn

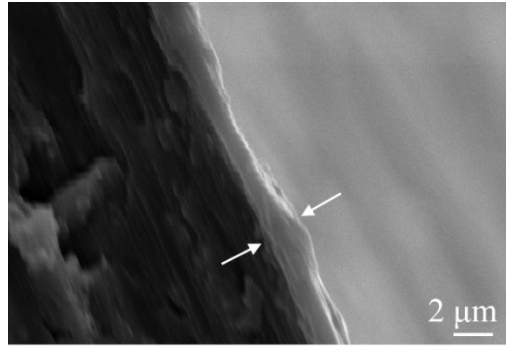

**Fig S1.** The SEM graph shows the thickness of the STPU, approximately 3  $\mu\text{m}$ .

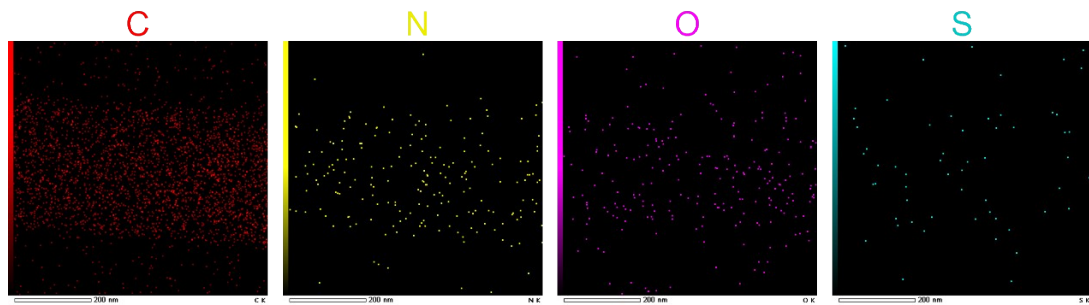

**Fig S2.** TEM shows the mapping of core-shell structural fibers

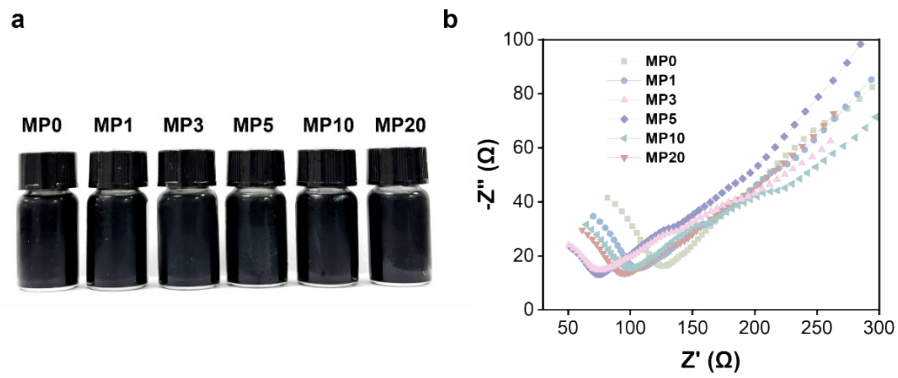

**Fig S3.** Photos of different concentrations of PEDOT: PSS mixed with MXene, as well as their Nyquist Plot.

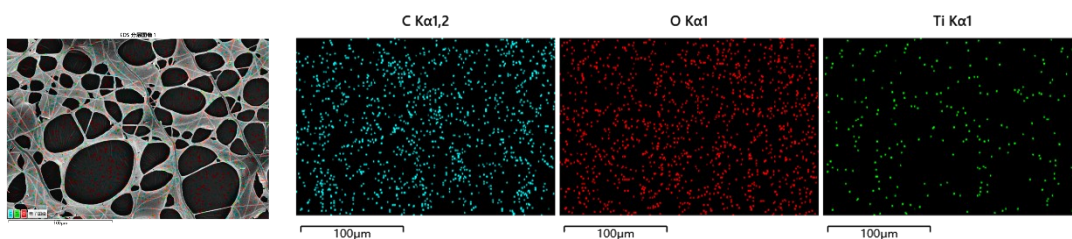

**Fig S4.** Energy dispersive spectroscopy mapping of C O and Ti elements distribution in MPST shown in the SEM image.

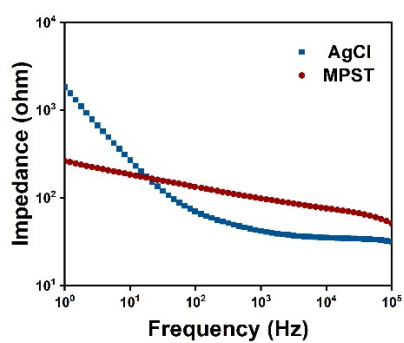

**Fig S5.** Interfacial impedance between commercial electrodes and MPST.

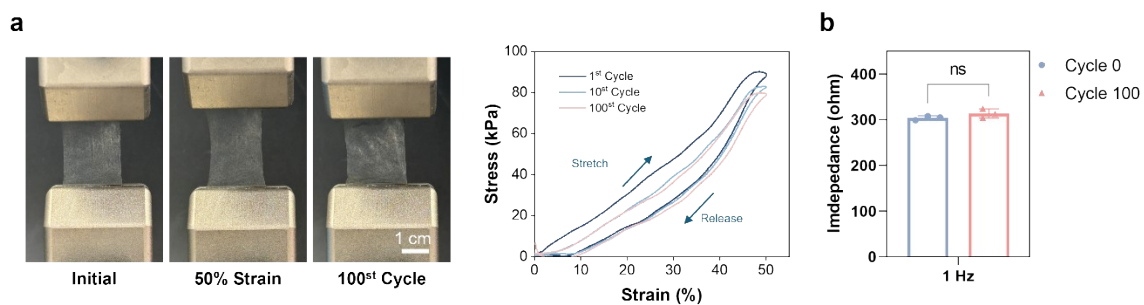

**Fig S6.** (a) MPST at the beginning-end of the cycle. (b) Impedance of MPST cycled 0 and 100 times at 50% strain.

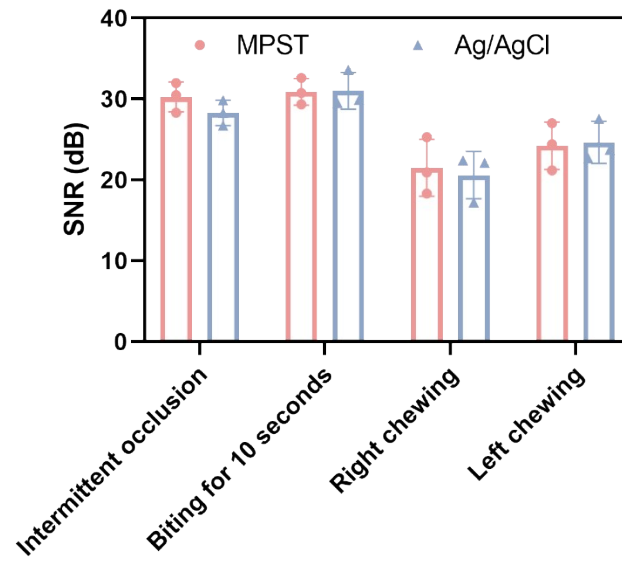

**Fig S7.** SNR of EMG signals by commercial gel (Ag/AgCl) and MPST in different conditions.
